# Supplementary material for: Two-step model of stop codon recognition by eukaryotic release factor eRF1
Source: PubMed Central journal article supplement — Nucleic Acids Res. 2013 Feb 22;41(8):4573–86. doi: 10.1093/nar/gkt113 (PMC3632111; doi:10.1093/nar/gkt113), 2013-02-22
Supplement: supp_gkt113_nar-02932-r-2012-File008.pdf [file supp_gkt113_nar-02932-r-2012-File008.pdf]

## SUPPLEMENTARY TABLES AND FIGURES

**Table S1.** Sequence of primers used for point mutagenesis

### Primers with restriction sites:

eRFNde 5'-GAGATATACATATGGCGGACGACCC-3'  
eRFBst(rev) 5'-CCATTCTTAAGCGGGCAAACGCAAGG-3'

### Mutant primers:

E25A (rev) 5'-GGGCCGCCACCAAGCTC-3'  
E25Q (rev) 5'-GGGCCGCCTGCAAGCTC-3'  
R28A 5'-ATTGCCAGCGGCCGCTCCAAGCTC-3'  
R28K 5'-CCATTGCCCTTGCCGCTCCAAGCTC-3'  
G29V (rev) 5'-GCCATTGACGCGGGCC-3'  
N30A (rev) 5'-GCTGGTGCCAGCGCCGCGGGC-3'  
N30D (rev) 5'-GCTGGTGCCATCGCCGCGGGC-3'  
G31Y 5'-ATGCTGGTGTAATTGCCGCG-3'  
G31V 5'-ATGCTGGTGACATTGCCGCG-3'  
T32A 5'-ATATCATGCTGGCGCCATTGCC-3'  
T32S 5'-ATATCATGCTGCTGCCATTGCCG-3'  
S33A (rev) 5'-CAATGATATCATGGCGGTGCC-3'  
S33T (rev) 5'-CAATGATATCATGGTGGTGCCATT-3'  
S36I (rev) 5'-GGAATGATCAATATTATCATGCTGGTGC-3'  
S36T(rev) 5'-GGAATGATCAATGTTATCATGCTGGTG-3'  
M51L 5'-CATCCGCTAACAGTTTTGCCACTC-3'  
M51R 5'-CATCCGCTAAGCGTTTTGCCACTC-3'  
E55A 5'-GCAGTTCCAAACGCATCCGCTAAC-3'  
E55Q 5'-GCAGTTCCAAACTGATCCGCTAAC-3'  
E55R 5'-GCAGTTCCAAACCGATCCGCTAAC-3'  
E55D 5'-GCAGTTCCAAAGTCATCCGCTAAC-3'  
A59V(rev) 5'-GACTTAATGTTAGATACAGTTCCAAACTCATC-3'  
A59S(rev) 5'-GACTTAATGTTAGATGAAGTTCCAAACTCATC-3'  
S60V 5'-ACTGCAGTTAACATTAAGTCACGAGTAAACCG-3'  
N61A 5'-CTGCATCTGCCATTAAGTCACGAGTAAACCG-3'  
N61S 5'-CTGCATCTTCCATTAAGTCACGAGTAAACCG-3'  
N61D 5'-CTGCATCTGACATTAAGTCACGAGTAAACCG-3'  
I62A 5'-CTGCATCTAACGCGAAGTCACGAGTAAACCG-3'  
I62V 5'-CTGCATCTAACGTGAAGTCACGAGTAAACCG-3'  
K63E (rev) 5'-GGTTTACTCGTGACTCAATGTTAGATGC-3'  
K63A 5'-CTGCATCTAACATTGCCTCACGAGTAAACCG-3'  
K63Q 5'-CTGCATCTAACATTCAGTCACGAGTAAACCG-3'  
K63R 5'-CTGCATCTAACATTCGCTCACGAGTAAACCG-3'  
S64A 5'-CTGCATCTAACATTAAGGCCCGAGTAAACCG-3'  
S64D 5'-CTGCATCTAACATTAAGGACCGAGTAAACCG-3'  
R65A 5'-GTTTACTGCTGACTTAATGTTAGATGC-3'  
N67D (rev) 5'-CTGAAAGGCGGTCTACTCGTGAC-3'  
R68A (rev) 5'-GTAAACGCCCTTTCAGTCCTGGG-3'  
S70A (rev) 5'-CAGGACTGCAAGGCGGTTTACT-3'  
S70T (rev) 5'-CCAGGACTGTAAGGCGGTTTACTC-3'  
V71F 5'-TGGCTCCCAGGAATGAAAGGCG-3'  
V71A 5'-CTCCAGGGCTGAAAGGCGGTT-3'  
G73S (rev) 5'-ACAGATGTAATGGCTGACAGGACTGAAAGG-3'  
I75A (rev) 5'-TGTACAGATGTAGCGGCTCCCA-3'  
T76A(rev) 5'-GTTGTACAGATGCAATGGCTCCC-3'  
V78A (rev) 5'-GTTTGAGTCTTTGTTGTGCAGATGTAATG-3'  
Q79E (rev) 5'-AGTTTGAGTCTTTGTTCTACAGATGTAATGG-3'  
Q79K (rev) 5'-AGTTTGAGTCTTTGTTTTACAGATGTAATGG-3'  
Q80E (rev) 5'-AGTTTGAGTCTTTCTTGTACAGATGTAATGG-3'  
R81E (rev) 5'-AGTTTGAGTCTTTGTTGTACAGATGTAATGG-3'  
Y96F (rev) 5'-CAA TTG TTC CAC AGA ATA CAA CCA GAC-3'  
Y96A (rev) 5'-CAATTGTTCCACAGGCTACAACCA-3'  
V101A 5'-GTGGAACAATTGCAACAGAAGAAGG-3'

**V101F** 5'-TGTGGAACAATTTTCACAGAAGAAGG-3'  
**E107K** 5'-GAAGAAGGAAAAGAAAAAGAAAGTCAACA-3'  
**E107Q** 5'-GAAGAAGGAAAAGCAAAAAGAAAGTCAAC-3'  
**E107A** 5'-GAAGAAGGAAAAGCAAAAAGAAAGTCAAC-3'  
**V110Y** 5'-GAAAGGAAAAGAAATACAACATTGACTTTG-3'  
**V110I** 5'-AGGAAAAGAAAATCAACATTGACTTTGA-3'  
**V110A** 5'-GAAAGGAAAAGAAAAGCCAACATTGA-3'  
**T122Q** 5'-CCAATTAATCAGTCATTGTATTTGTGTGAC-3'  
**S123F** 5'-CCAATTAATACGTTCTTGTATTTGTGTGAC-3'  
**Y125F** 5'-AATACGTCATTGTTTTTGTGTGACAAC-3'  
**Y125A** 5'-AATACGTCATTGGCTTTGTGTGACAAC-3'  
**L126F** 5'-CTGCATTGTATTTCTGTGACAACAAATTCC-3'  
**C127S** 5'-GTATTTGTCTGACAACAAATTCC-3'  
**C127A** 5'-TCATTGTATTTGGCTGACAACAAATTCC-3'  
**D128R** 5'-GTGACAACAAATTCGCTACAGAGG-3'  
**D128G** 5'-GTGTGGCAACAAATTCATACAGAGG-3'  
**N129A** 5'-GTGTGACGCAAAATTCATACAGAGG-3'  
**N129P** 5'-GTGTGACCCTAAATTCATACAGAGG-3'  
**N129D** 5'-CATTGTGTGACGACAATTCATACAG-3'  
**F131A** 5'-GACAACAAAGCCCATACAGAGGCTC-3'  
**F131Y** 5'-GACAACAAATATCATACAGAGGCTC-3'  
**E134S** 5'-ACAAATTCATACATCGGCTCTTACA-3'  
**E134A** 5'-ACAAATTCATACAGCGGCTCTTAC-3'  
**E134Q** 5'-ACAAATTCATACACAGGCTCTTACAG-3'

**Table S2.** The RF activity of the human eRF1 mutants

| Position   | Replacement                  | RF activity, % |     |     |
|------------|------------------------------|----------------|-----|-----|
|            |                              | UAA            | UAG | UGA |
| E25        | E25A<br>E25Q                 | 109            | 73  | 93  |
|            |                              | 116            | 130 | 109 |
| R28        | R28A<br>R28K                 | 73             | 57  | 85  |
|            |                              | 79             | 58  | 71  |
| G29        | G29V                         | 107            | 78  | 102 |
| N30        | N30A<br>N30D                 | 94             | 94  | 104 |
|            |                              | 67             | 59  | 76  |
| G31        | G31Y<br>G31V                 | 52             | 53  | 56  |
|            |                              | 46             | 43  | 29  |
| <b>T32</b> | T32A<br>T32S                 | 32             | 30  | 75  |
|            |                              | 75             | 93  | 112 |
| <b>S33</b> | S33A<br>S33T                 | 100            | 90  | 63  |
|            |                              | 94             | 71  | 46  |
| <b>S36</b> | S36I<br>S36T                 | 0              | 5   | 24  |
|            |                              | 120            | 86  | 97  |
| M51        | M51L<br>M51R                 | 65             | 100 | 85  |
|            |                              | 120            | 110 | 100 |
| <b>E55</b> | E55A<br>E55Q<br>E55R<br>E55D | 117            | 48  | 90  |
|            |                              | 127            | 53  | 89  |
|            |                              | 80             | 20  | 120 |
|            |                              | 76             | 53  | 76  |
| A59        | A59S<br>A59V                 | 68             | 70  | 73  |
|            |                              | 46             | 36  | 41  |
| S60        | S60V                         | 94             | 92  | 72  |
| <b>N61</b> | N61A<br>N61S<br>N61D         | 64             | 68  | 75  |
|            |                              | 16             | 20  | 13  |
|            |                              | 16             | 20  | 6   |
| <b>I62</b> | I62A<br>I62V                 | 3              | 5   | 8   |
|            |                              | 53             | 48  | 50  |
| <b>K63</b> | K63A<br>K63E<br>K63Q<br>K63R | 22             | 20  | 24  |
|            |                              | 18             | 13  | 13  |
|            |                              | 5              | 7   | 13  |
|            |                              | 97             | 108 | 111 |
| <b>S64</b> | S64A                         | 110            | 92  | 90  |
| R65        | R65A                         | 26             | 21  | 32  |
| N67        | N67D                         | 2              | 2   | 6   |
| R68        | R68A                         | 0              | 5   | 2   |
| <b>S70</b> | S70A<br>S70T                 | 78             | 92  | 42  |
|            |                              | 60             | 55  | 30  |
| <b>V71</b> | V71F<br>V71A                 | 33             | 77  | 18  |
|            |                              | 4              | 55  | 28  |
| G73        | G73S                         | 83             | 77  | 84  |
| I75        | I75A                         | 18             | 14  | 13  |
| T76        | T76A                         | 71             | 90  | 61  |
| V78        | V78A                         | 100            | 100 | 80  |
| Q79        | Q79K<br>Q79E                 | 210            | 220 | 200 |
|            |                              | 76             | 39  | 57  |
| Q80        | Q80E                         | 14             | 10  | 15  |

|             |                                              |                       |                      |                       |
|-------------|----------------------------------------------|-----------------------|----------------------|-----------------------|
| R81         | R81E                                         | 7                     | 0                    | 6                     |
| Y96         | Y96A<br>Y96F                                 | 63<br>106             | 37<br>67             | 73<br>86              |
| V101        | V101A<br>V101F                               | 95<br>93              | 90<br>93             | 85<br>94              |
| E107        | E107Q<br>E107K<br>E107A                      | 118<br>122<br>136     | 125<br>146<br>135    | 123<br>133<br>134     |
| V110        | V110I<br>V110A<br>V110Y                      | 100<br>98<br>95       | 99<br>100<br>93      | 92<br>98<br>96        |
| T122        | T122Q<br>T122Q/S123F/L124M/L126F<br>(QFM_F)  | 38<br>18              | 29<br>13             | 47<br>106             |
| S123        | S123F                                        | 38                    | 21                   | 31                    |
| <b>Y125</b> | Y125F<br>Y125A                               | 92<br>0               | 78<br>3              | 92<br>2               |
| L126        | L126F                                        | 85                    | 77                   | 105                   |
| C127        | C127S<br>C127A                               | 67<br>50              | 62<br>62             | 63<br>63              |
| D128        | D128R<br>D128G                               | 157<br>129            | 162<br>105           | 142<br>97             |
| <b>N129</b> | N129A<br>N129P<br>N129D<br>N129P/K130Q (DPQ) | 32<br>112<br>55<br>21 | 40<br>77<br>45<br>33 | 28<br>142<br>70<br>63 |
| <b>F131</b> | F131A<br>F131Y                               | 15<br>55              | 13<br>52             | 37<br>62              |
| E134        | E134S<br>E134A<br>E134Q                      | 100<br>99<br>96       | 80<br>82<br>75       | 78<br>94<br>100       |

The RF activity of the wild-type eRF1 was considered 100%, error values varied from 5 to 10% for different eRF1 mutants.

The amino acid residues of the N domain important for stop codon decoding are marked in bold.

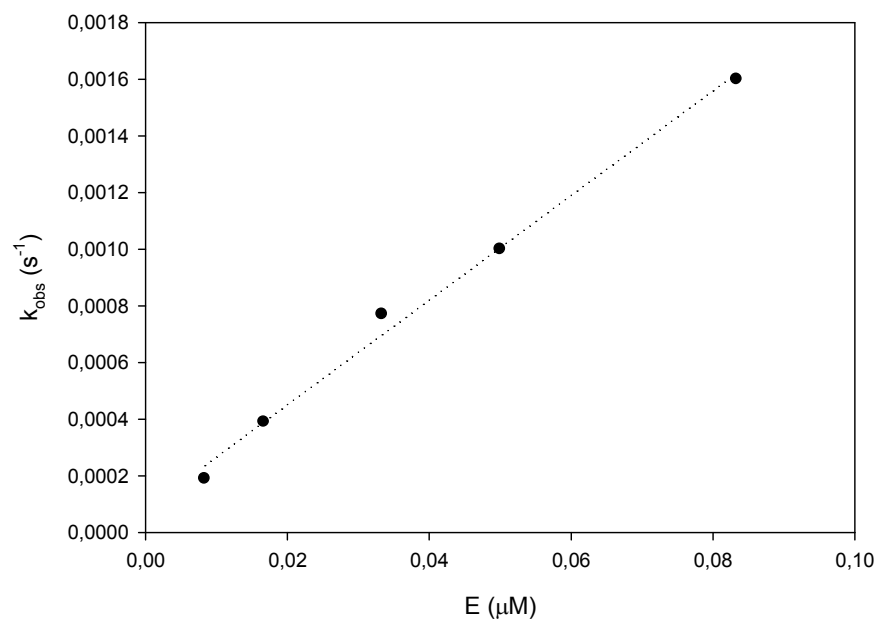

Figure S1. Graph of  $k_{\text{obs}}$  versus eRF1 concentration ( $E$ ).  $k_{\text{obs}}$  was determined in 50  $\mu\text{l}$  termination reaction containing 0.0125 pmol of the preTC and different amounts of eRF1 (0.25 – 4 pmol).

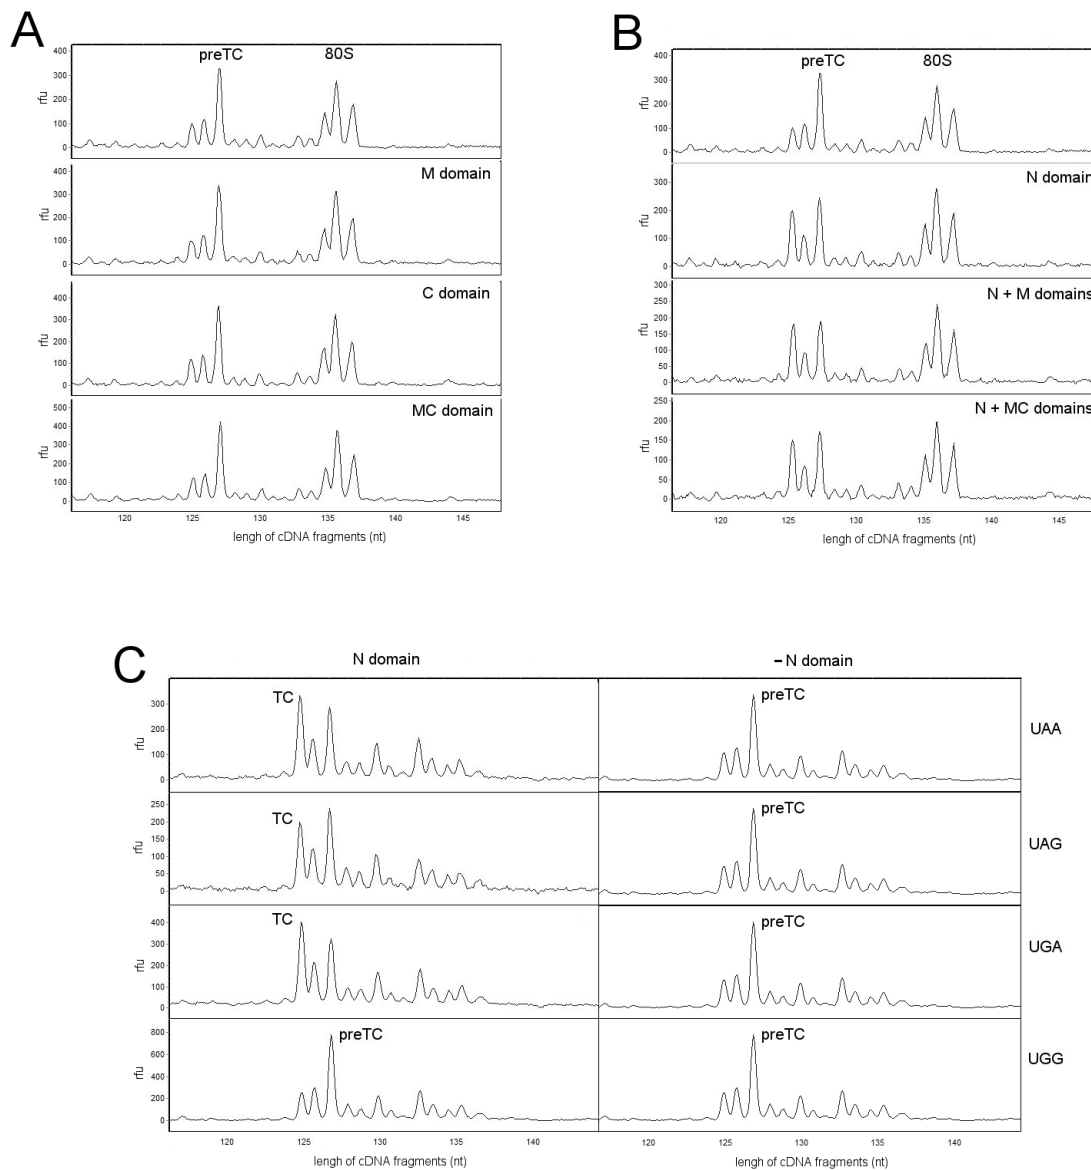

Figure S2. Conformational rearrangement of ribosomal complexes during termination of translation. (A) Toe-prints with M, C, and MC domains of human eRF1 on UAA codon, (B) toe-prints with N, N+M, and N+MC domains of human eRF1 on UAA codon (C) toe-prints with N domain of human eRF1 on different stop codons and UGG codon. cDNAs corresponding to pretermination complex and termination complex have the 127 and 125 nt length, respectively. RFU, relative fluorescence unit.
